# Supplementary material for: Anti-obesity effects of secondary metabolites from Chrysosplenium flagelliferum: in vitro and in silico studies
Source: Royal Society of Chemistry journal article supplement (doi:10.1039/d6ra00782a), 2026-05-13
Supplement: d6ra00782a1.pdf [file d6ra00782a1.pdf]

## Supplementary Material

### Anti-obesity Effects of Secondary Metabolites from *Chrysosplenium flagelliferum*: *In Vitro* and *In Silico* Studies

Eun Jin Heo<sup>a,b†</sup>, Bowon Jung<sup>a,b†</sup>, Sunbeom Kwon<sup>a,b</sup>, Min Yeong Choi<sup>c</sup>, Yoon Seo Jang<sup>d</sup>, Ki  
Hyun Kim<sup>d</sup>, Gwang Hun Park<sup>c</sup>, Ji Ah Kim<sup>c\*</sup>, Seulah Lee<sup>a,b\*</sup>

<sup>a</sup>Department of Convergent Biotechnology and Advanced Materials Science, BK21  
Interdisciplinary Program in IT-Bio Convergence System, Kyung Hee University, Yongin  
17104, Republic of Korea

<sup>b</sup>Center for Space Biomedical Sciences, G-LAMP NEXUS Institute, Kyung Hee University,  
Yongin 17104, Republic of Korea

<sup>c</sup>Forest Medicinal Resources Research Center, National Institute of Forest Science, Yeongju  
36040, Republic of Korea

<sup>d</sup>School of Pharmacy, Sungkyunkwan University, Suwon 16419, Republic of Korea

<sup>†</sup>These authors contributed equally to this work

Correspondence to:

TEL: +82-54-630-5641; FAX: +82-54-630-5678; E-mail: jiahkim@korea.kr

TEL: +82-31-201-2662; FAX: +82-31-201-2662; E-mail: lee.seulah@khu.ac.kr

## Table of Contents

|                                                                                                                |    |
|----------------------------------------------------------------------------------------------------------------|----|
| <b>Figure S1.</b> $^1\text{H}$ NMR spectrum (850 MHz, $\text{CD}_3\text{OD}$ ) of compound <b>1</b> .....      | 4  |
| <b>Figure S2.</b> $^{13}\text{C}$ NMR spectrum (212.5 MHz, $\text{CD}_3\text{OD}$ ) of compound <b>1</b> ..... | 4  |
| <b>Figure S3.</b> HSQC spectrum of compound <b>1</b> .....                                                     | 5  |
| <b>Figure S4.</b> HMBC spectrum of compound <b>1</b> .....                                                     | 6  |
| <b>Figure S5.</b> $^1\text{H}$ - $^1\text{H}$ COSY spectrum of compound <b>1</b> .....                         | 7  |
| <b>Figure S6.</b> ROESY spectrum of compound <b>1</b> .....                                                    | 8  |
| <b>Figure S7.</b> HR-ESI-MS spectrum of compound <b>1</b> .....                                                | 9  |
| <b>Figure S8.</b> UV spectrum of compound <b>1</b> .....                                                       | 9  |
| <b>Figure S9.</b> $^1\text{H}$ NMR spectrum (600 MHz, $\text{CDCl}_3$ ) of compound <b>2</b> .....             | 10 |
| <b>Figure S10.</b> $^{13}\text{C}$ NMR spectrum (150 MHz, $\text{CDCl}_3$ ) of compound <b>2</b> .....         | 10 |
| <b>Figure S11.</b> $^1\text{H}$ NMR spectrum (600 MHz, $\text{CD}_3\text{OD}$ ) of compound <b>3</b> .....     | 11 |
| <b>Figure S12.</b> ESI-MS spectrum of compound <b>3</b> .....                                                  | 11 |
| <b>Figure S13.</b> $^1\text{H}$ NMR spectrum (600 MHz, $\text{CD}_3\text{OD}$ ) of compound <b>4</b> .....     | 12 |
| <b>Figure S14.</b> ESI-MS spectrum of compound <b>4</b> .....                                                  | 12 |
| <b>Figure S15.</b> $^1\text{H}$ NMR spectrum (600 MHz, $\text{CD}_3\text{OD}$ ) of compound <b>5</b> .....     | 13 |
| <b>Figure S16.</b> ESI-MS spectrum of compound <b>5</b> .....                                                  | 13 |
| <b>Figure S17.</b> $^1\text{H}$ NMR spectrum (600 MHz, $\text{CDCl}_3$ ) of compound <b>6</b> .....            | 14 |
| <b>Figure S18.</b> ESI-MS spectrum of compound <b>6</b> .....                                                  | 14 |
| <b>Figure S19.</b> $^1\text{H}$ NMR spectrum (600 MHz, $\text{CDCl}_3$ ) of compound <b>7</b> .....            | 15 |

|                                                                                                                                                                                                                            |    |
|----------------------------------------------------------------------------------------------------------------------------------------------------------------------------------------------------------------------------|----|
| <b>Figure S20.</b> ESI-MS spectrum of compound <b>7</b> .....                                                                                                                                                              | 15 |
| <b>Figure S21.</b> <sup>1</sup> H NMR spectrum (600 MHz, DMSO- <i>d</i> <sub>6</sub> ) of compound <b>8</b> .....                                                                                                          | 16 |
| <b>Figure S22.</b> ESI-MS spectrum of compound <b>8</b> .....                                                                                                                                                              | 16 |
| <b>Figure S23.</b> <sup>1</sup> H NMR spectrum (600 MHz, CD <sub>3</sub> OD) of compound <b>9</b> .....                                                                                                                    | 17 |
| <b>Figure S24.</b> ESI-MS spectrum of compound <b>9</b> .....                                                                                                                                                              | 17 |
| <b>Figure S25.</b> <sup>1</sup> H NMR spectrum (600 MHz, CD <sub>3</sub> OD) of compound <b>10</b> .....                                                                                                                   | 18 |
| <b>Figure S26.</b> ESI-MS spectrum of compound <b>10</b> .....                                                                                                                                                             | 18 |
| <b>Figure S27.</b> <sup>1</sup> H NMR spectrum (600 MHz, CD <sub>3</sub> OD) of compound <b>11</b> .....                                                                                                                   | 19 |
| <b>Figure S28.</b> <sup>1</sup> H NMR spectrum (600 MHz, CD <sub>3</sub> OD) of compound <b>12</b> .....                                                                                                                   | 19 |
| <b>Figure S29.</b> <sup>13</sup> C NMR spectrum (150 MHz, CD <sub>3</sub> OD) of compound <b>12</b> .....                                                                                                                  | 20 |
| <b>Figure S30.</b> Results of DP4+ analysis of <b>1</b> (Isomer 1, 23 <i>S</i> - <b>1</b> ; Isomer 2, 23 <i>R</i> - <b>1</b> ). .....                                                                                      | 21 |
| <b>Figure S31.</b> <i>In vitro</i> cell viability results of compounds <b>2</b> and <b>6</b> .....                                                                                                                         | 21 |
| <b>Table S1.</b> Gibbs free energies and Boltzmann distribution of conformers (23 <i>S</i> - <b>1</b> ) .....                                                                                                              | 22 |
| <b>Table S2.</b> Gibbs free energies and Boltzmann distribution of conformers (23 <i>R</i> - <b>1</b> ).....                                                                                                               | 22 |
| <b>Table S3.</b> Experimental (Exp.) and calculated (Cal.) <sup>1</sup> H and <sup>13</sup> C chemical shift values and its possible isomer 23 <i>S</i> - <b>1</b> and 23 <i>R</i> - <b>1</b> used for DP4+ analysis ..... | 23 |
| <b>Table S4.</b> Linear regression data for the quantitation analysis of compound <b>6</b> .....                                                                                                                           | 24 |

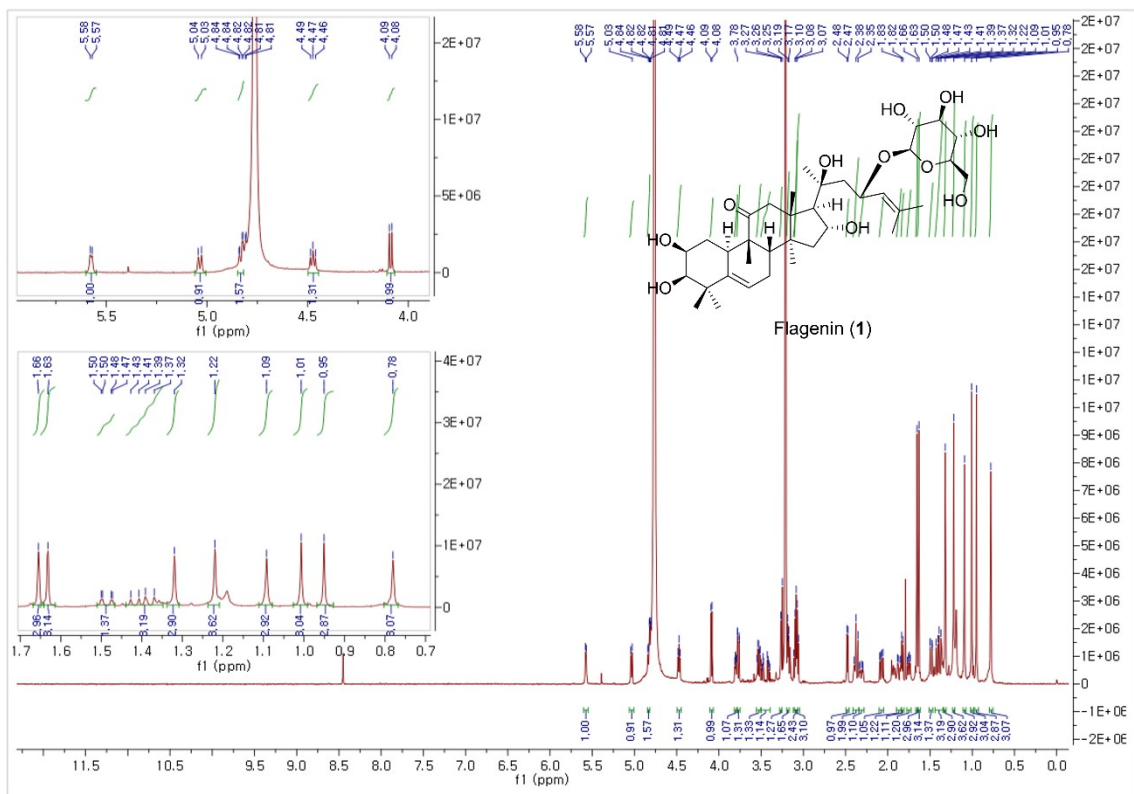

Figure S1.  $^1\text{H}$  NMR spectrum (850 MHz,  $\text{CD}_3\text{OD}$ ) of compound 1

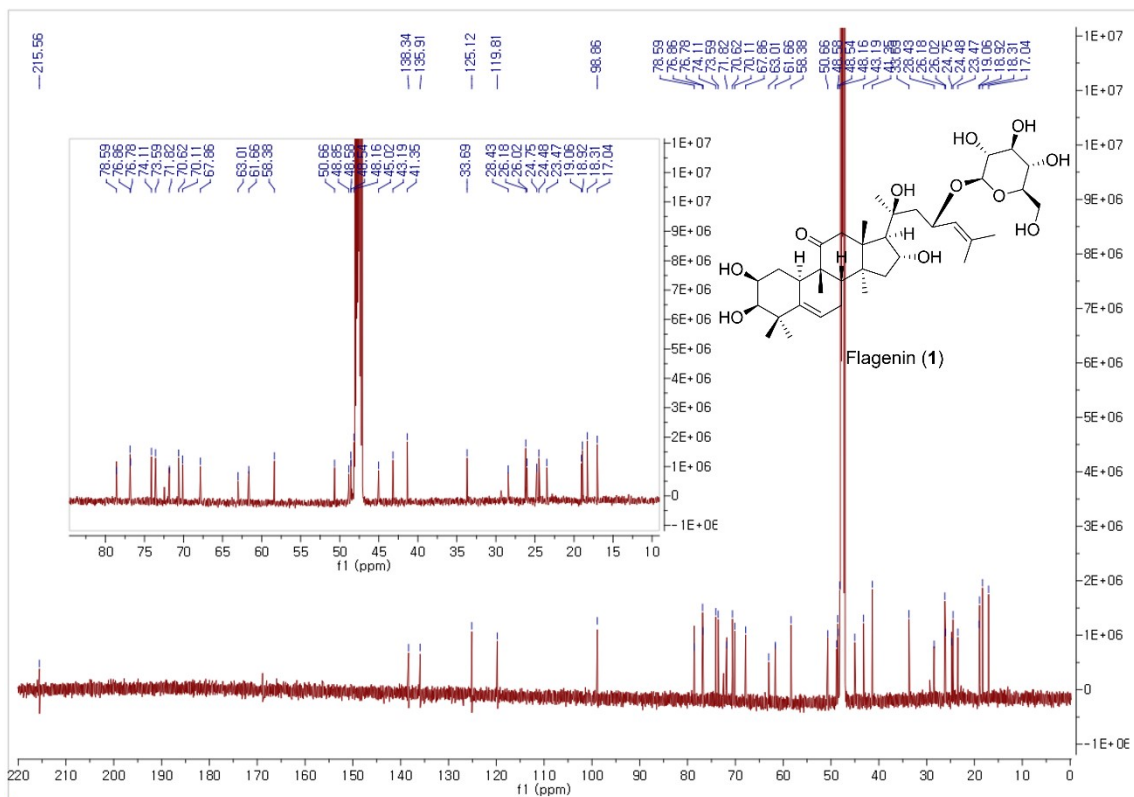

Figure S2.  $^{13}\text{C}$  NMR spectrum (212.5 MHz,  $\text{CD}_3\text{OD}$ ) of compound 1

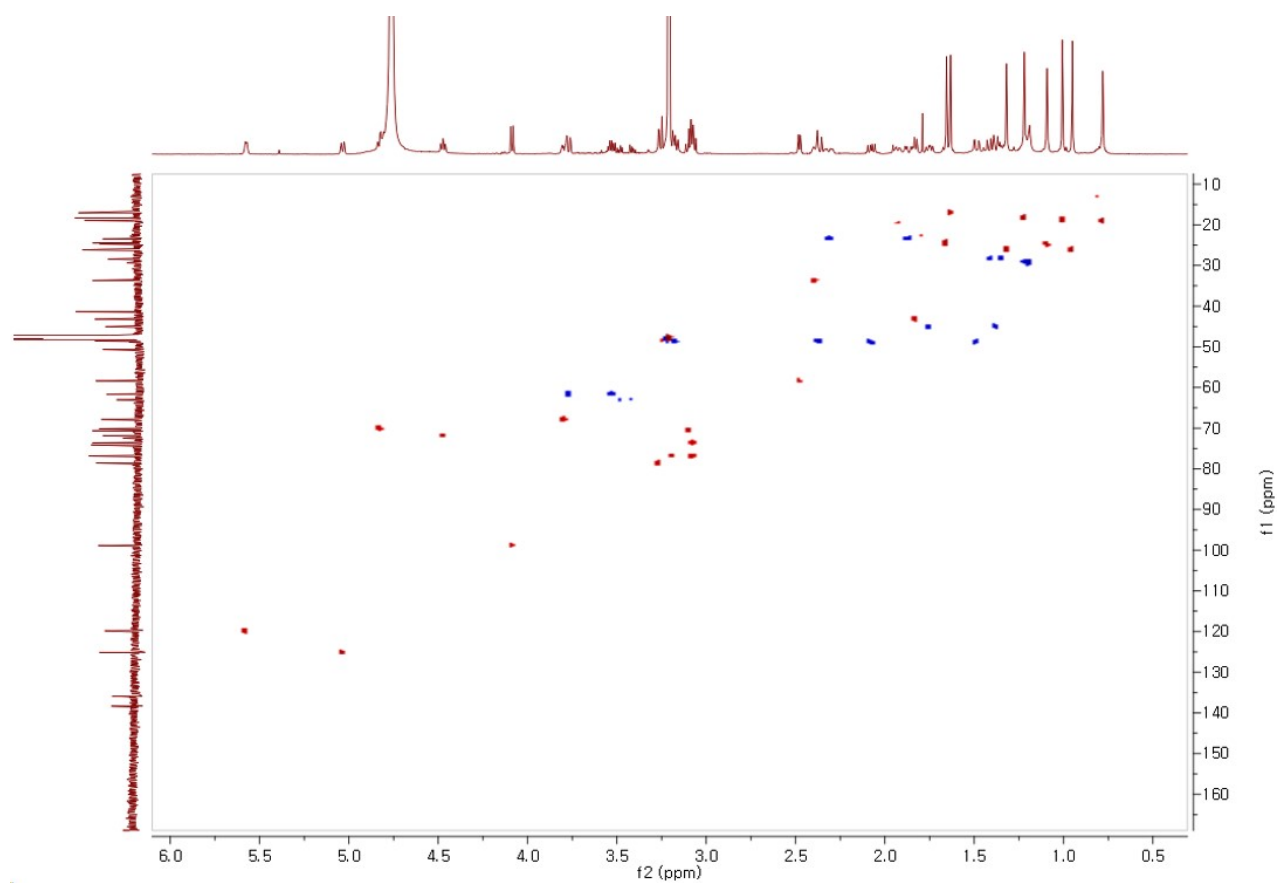

**Figure S3.** HSQC spectrum of compound **1**

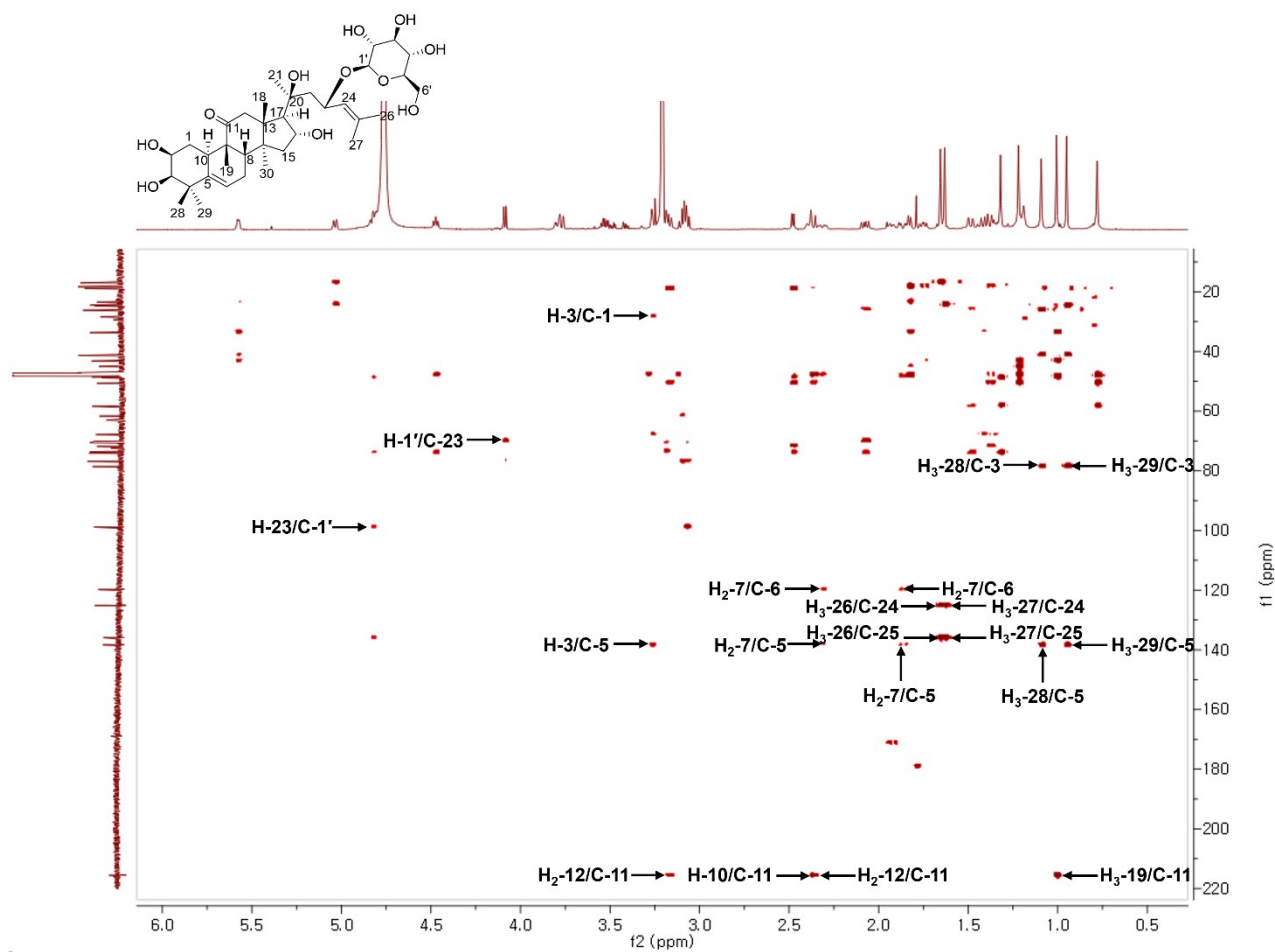

Figure S4. HMBC spectrum of compound 1

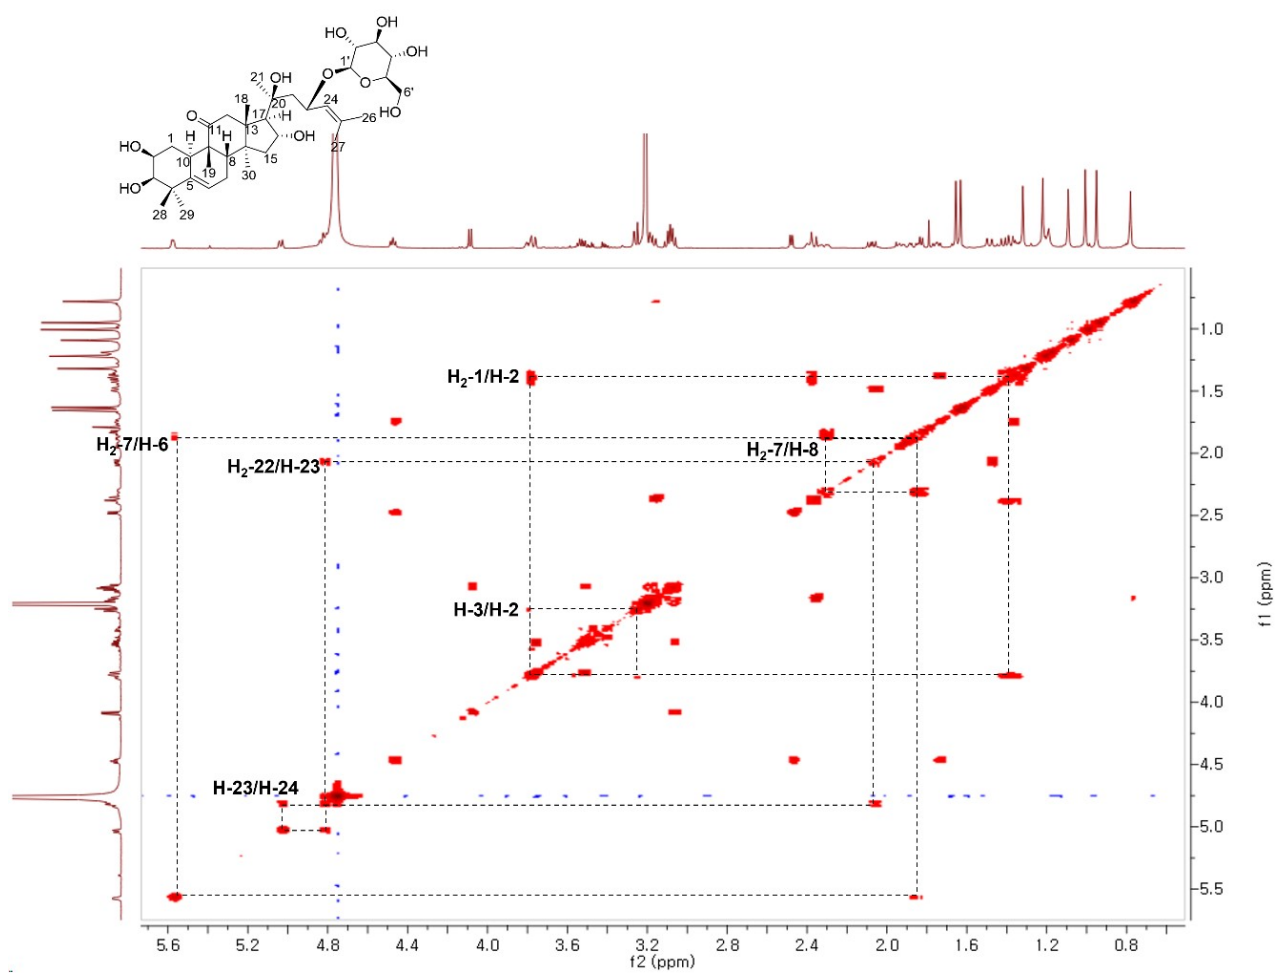

Figure S5.  $^1\text{H}$ - $^1\text{H}$  COSY spectrum of compound 1

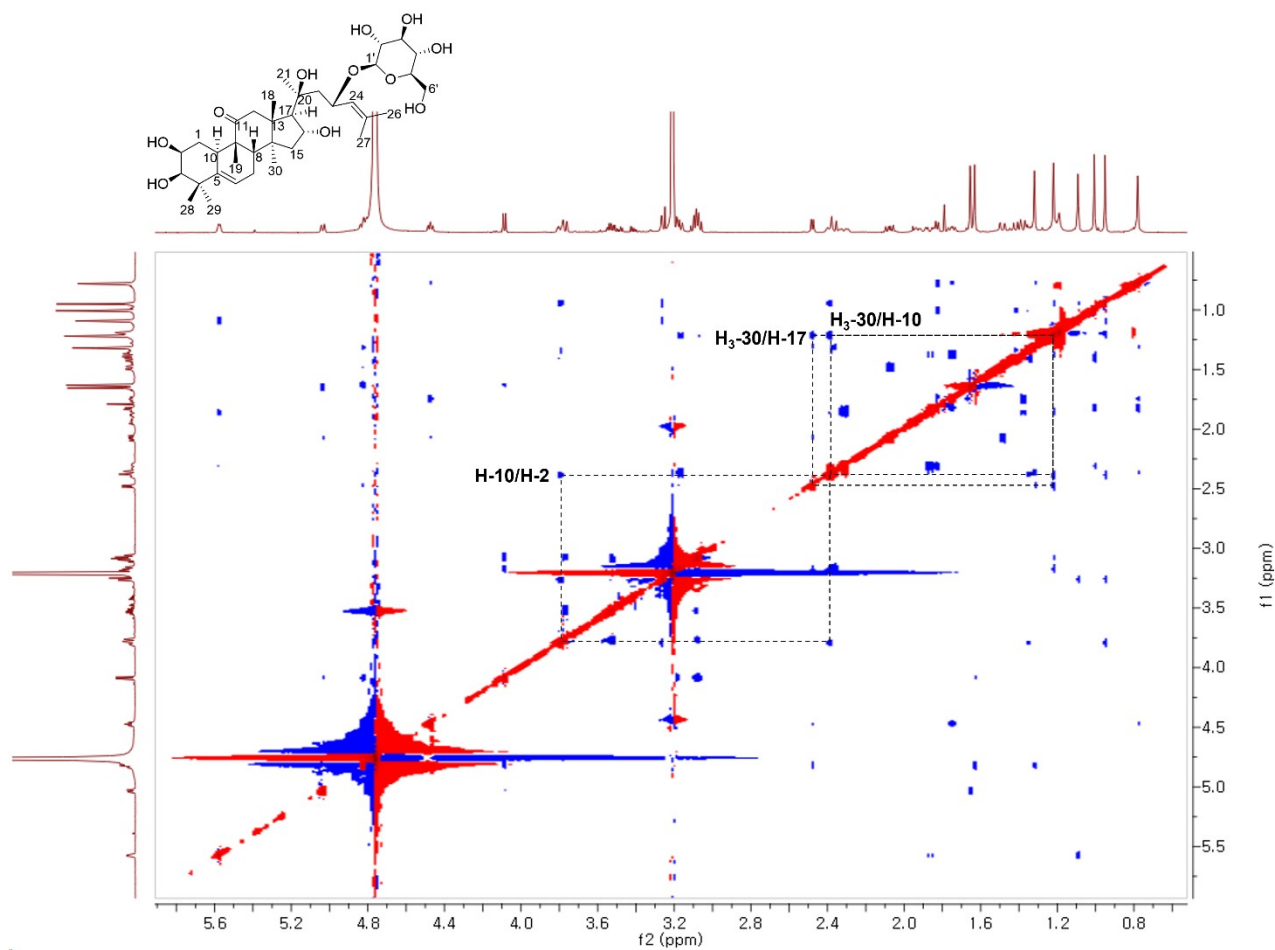

**Figure S6.** ROESY spectrum of compound **1**

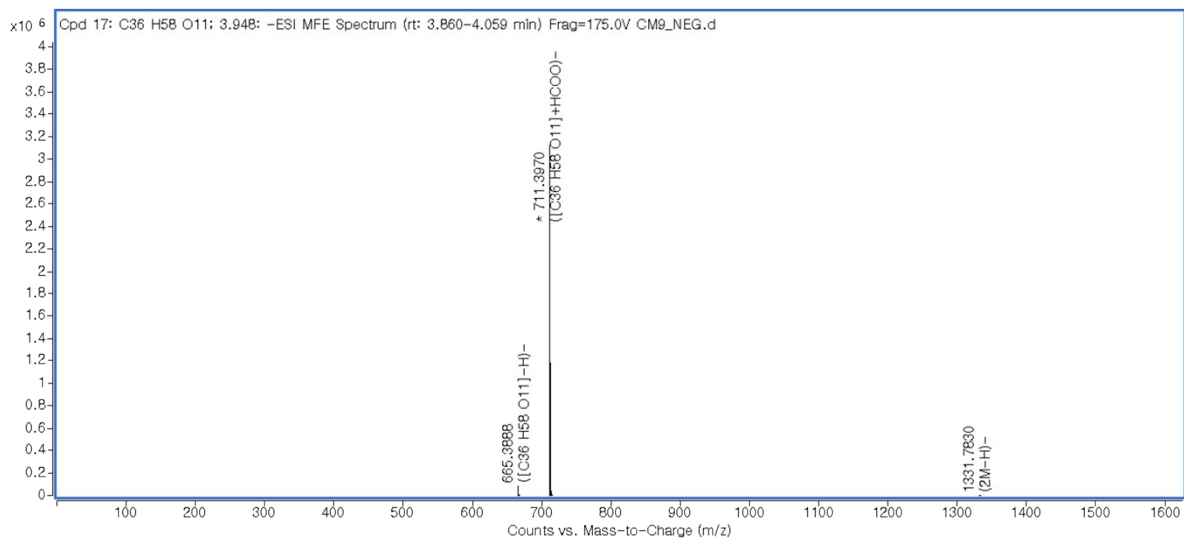

**Figure S7.** HR-ESI-MS spectrum of compound **1**

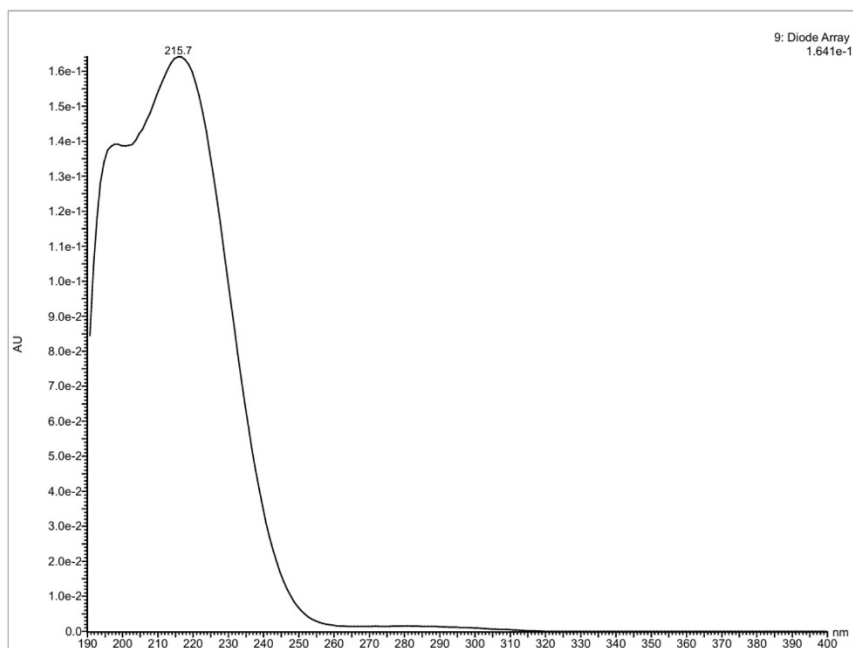

**Figure S8.** UV spectrum of compound **1**



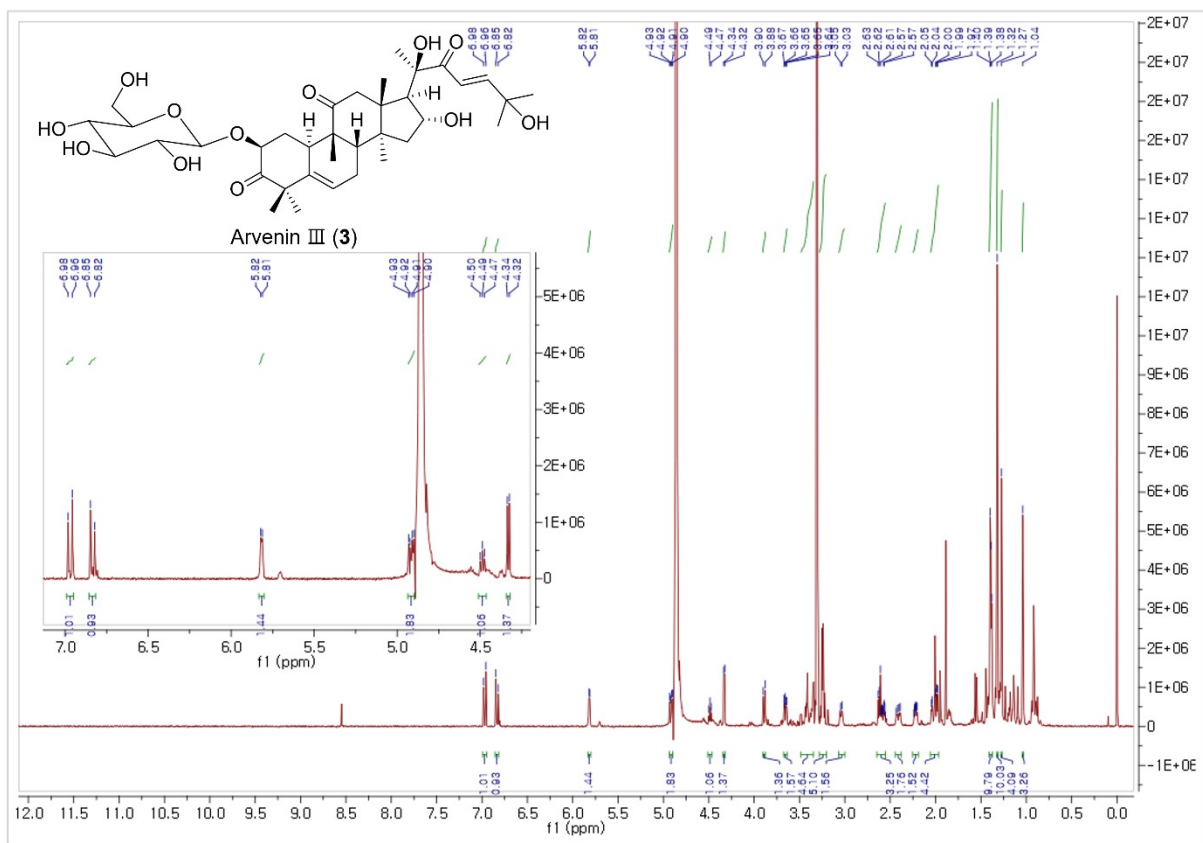

Figure S11.  $^1\text{H}$  NMR spectrum (600 MHz,  $\text{CD}_3\text{OD}$ ) of compound 3

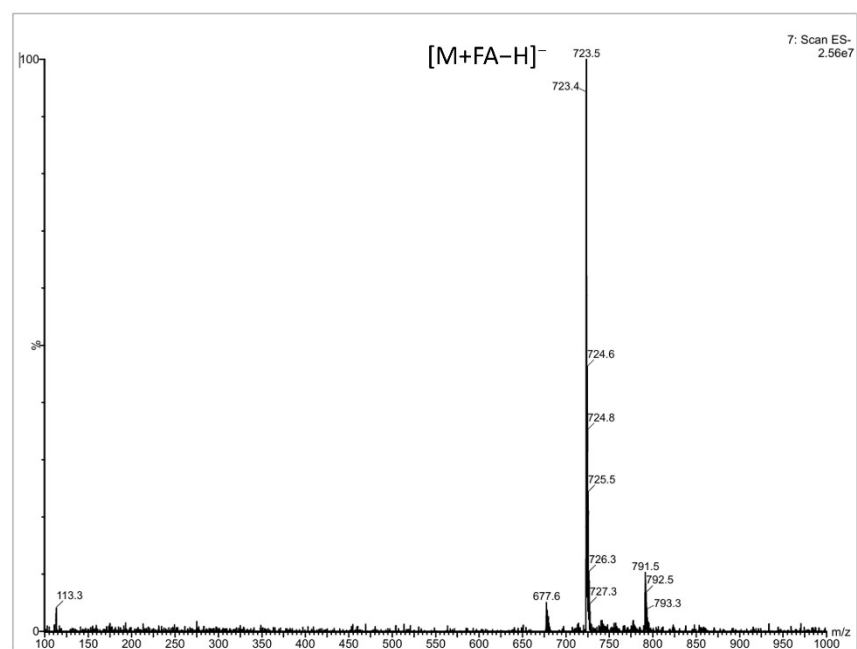

Figure S12. ESI-MS spectrum of compound 3



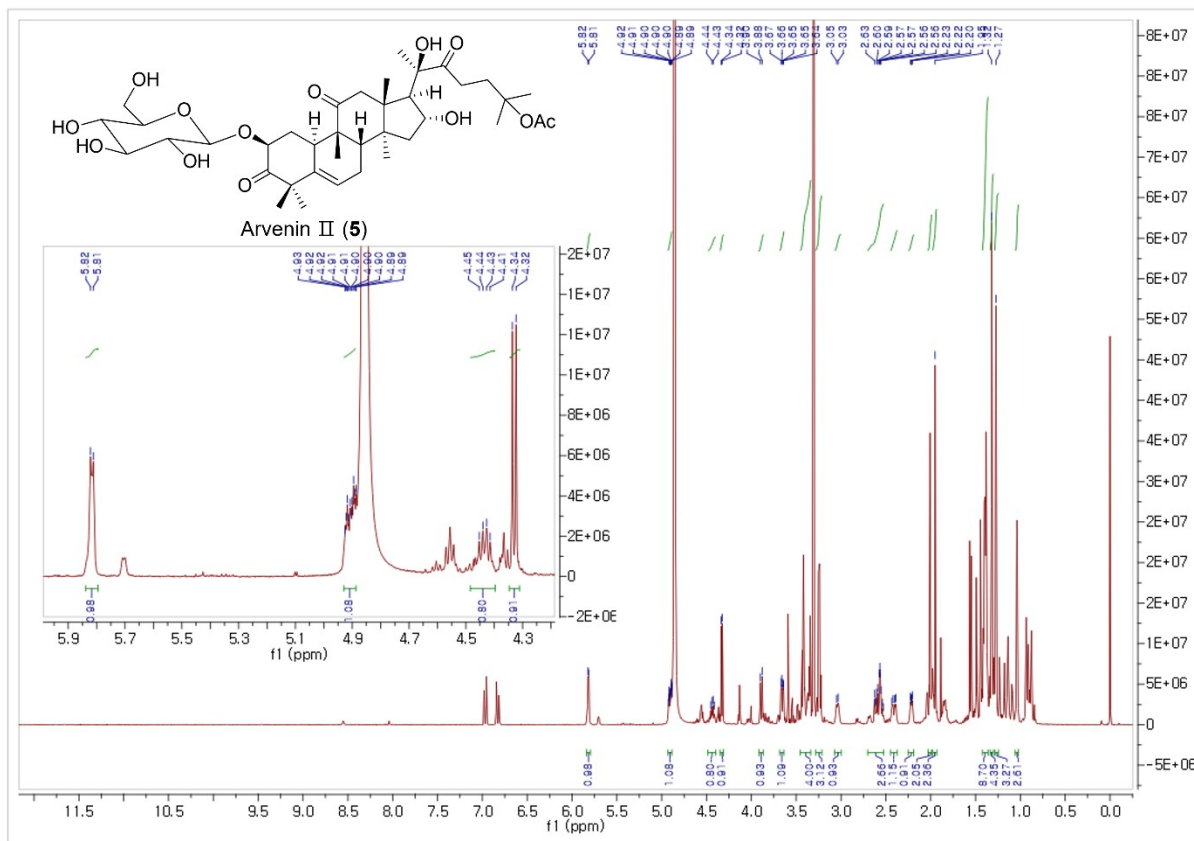

**Figure S15.**  $^1\text{H}$  NMR spectrum (600 MHz,  $\text{CD}_3\text{OD}$ ) of compound **5**

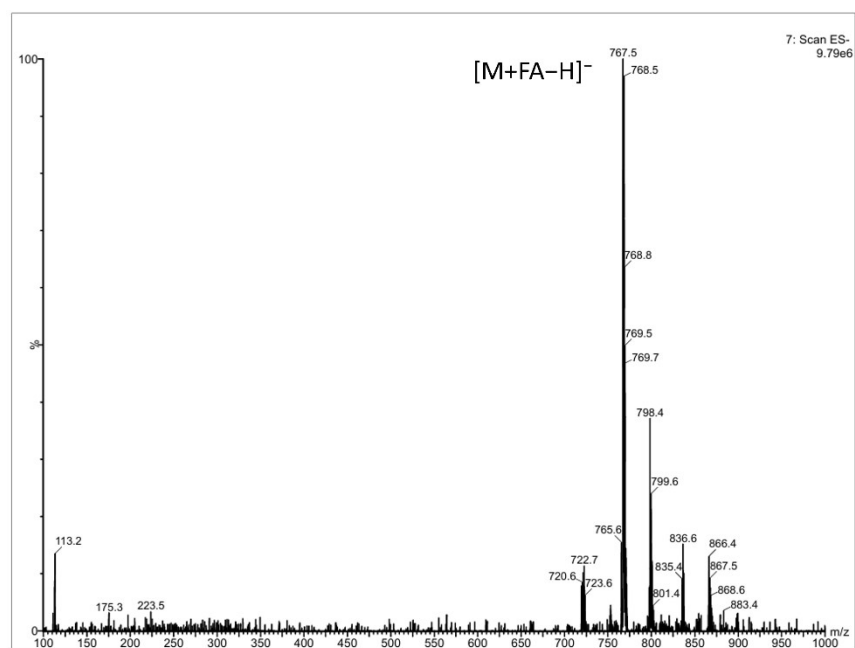

**Figure S16.** ESI-MS spectrum of compound **5**

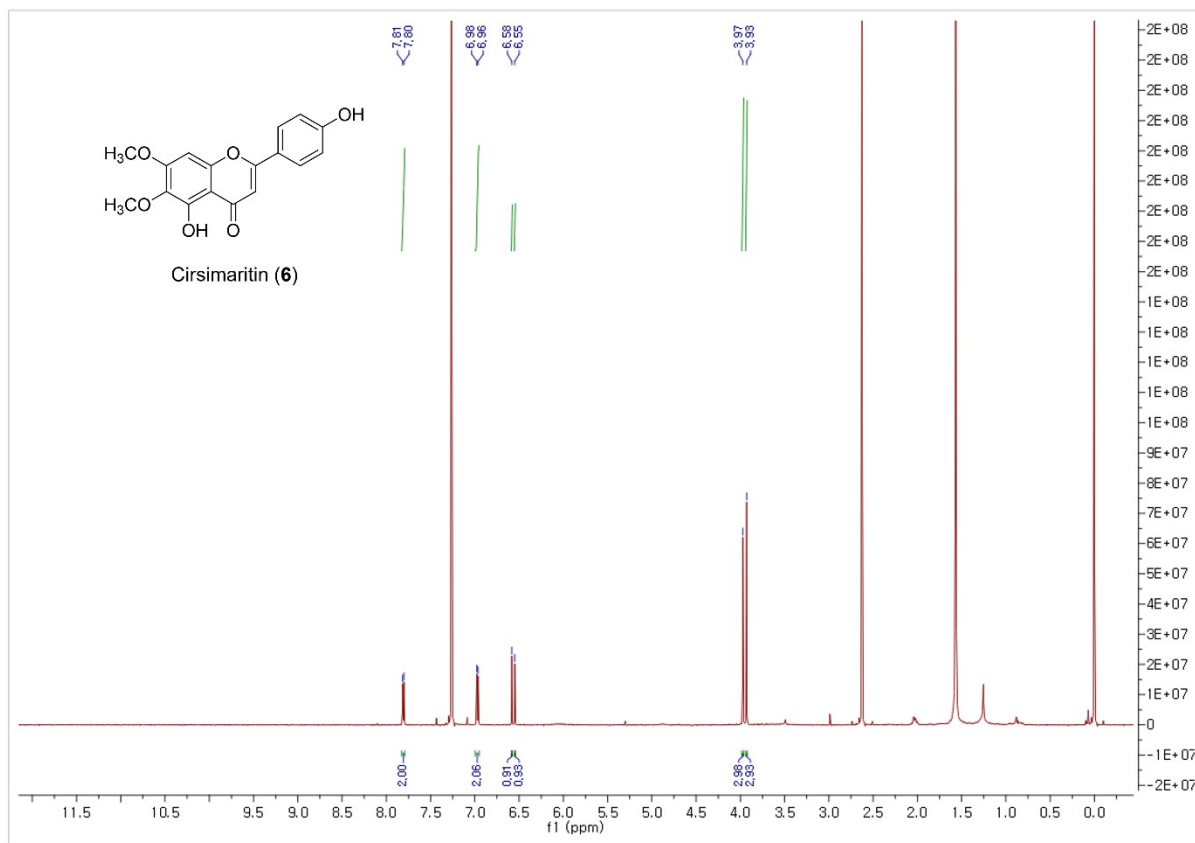

**Figure S17.**  $^1\text{H}$  NMR spectrum (600 MHz,  $\text{CDCl}_3$ ) of compound 6

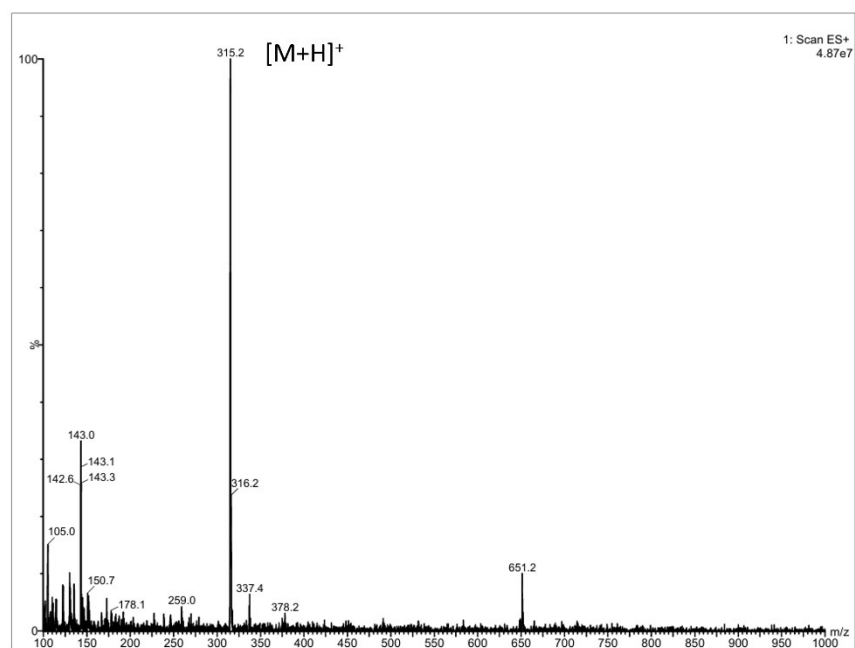

**Figure S18.** ESI-MS spectrum of compound 6

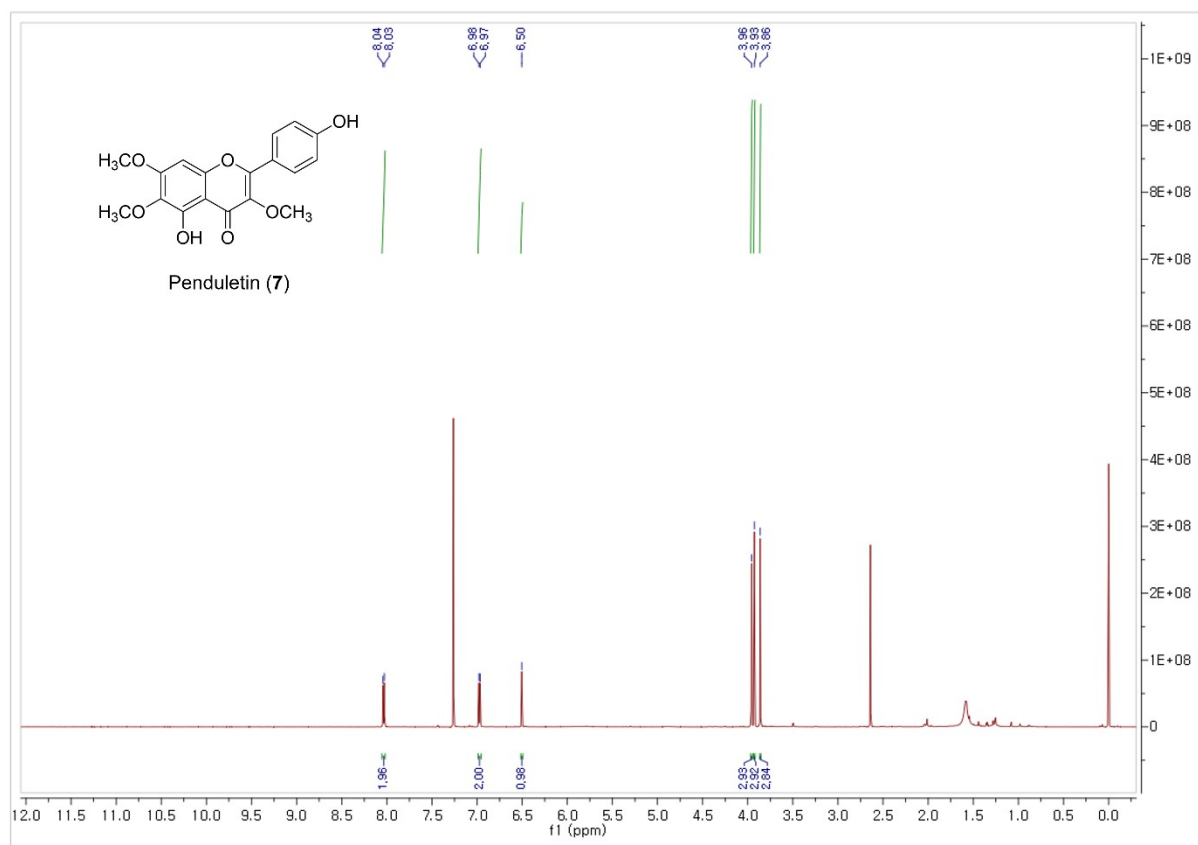

Figure S19. <sup>1</sup>H NMR spectrum (600 MHz, CDCl<sub>3</sub>) of compound 7

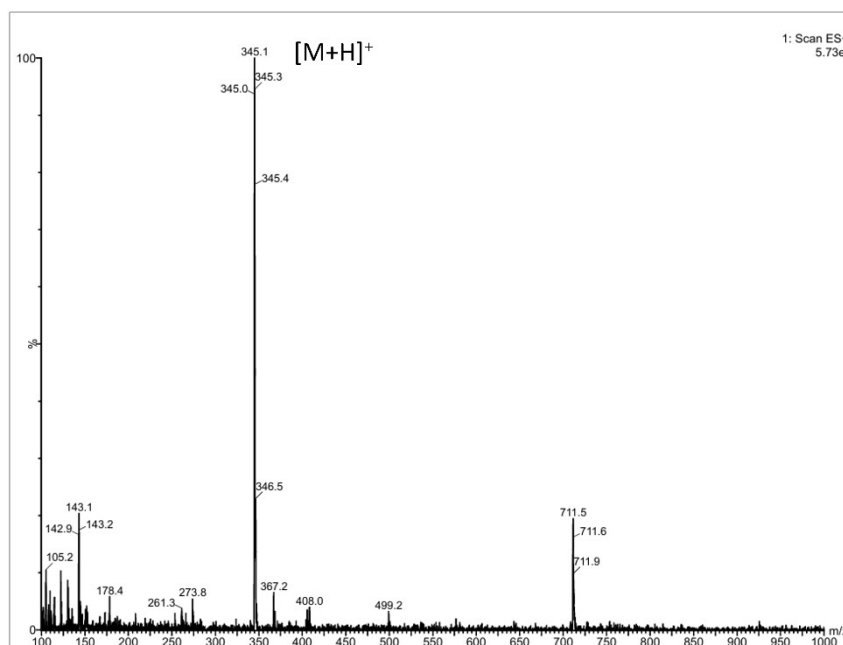

Figure S20. ESI-MS spectrum of compound 7

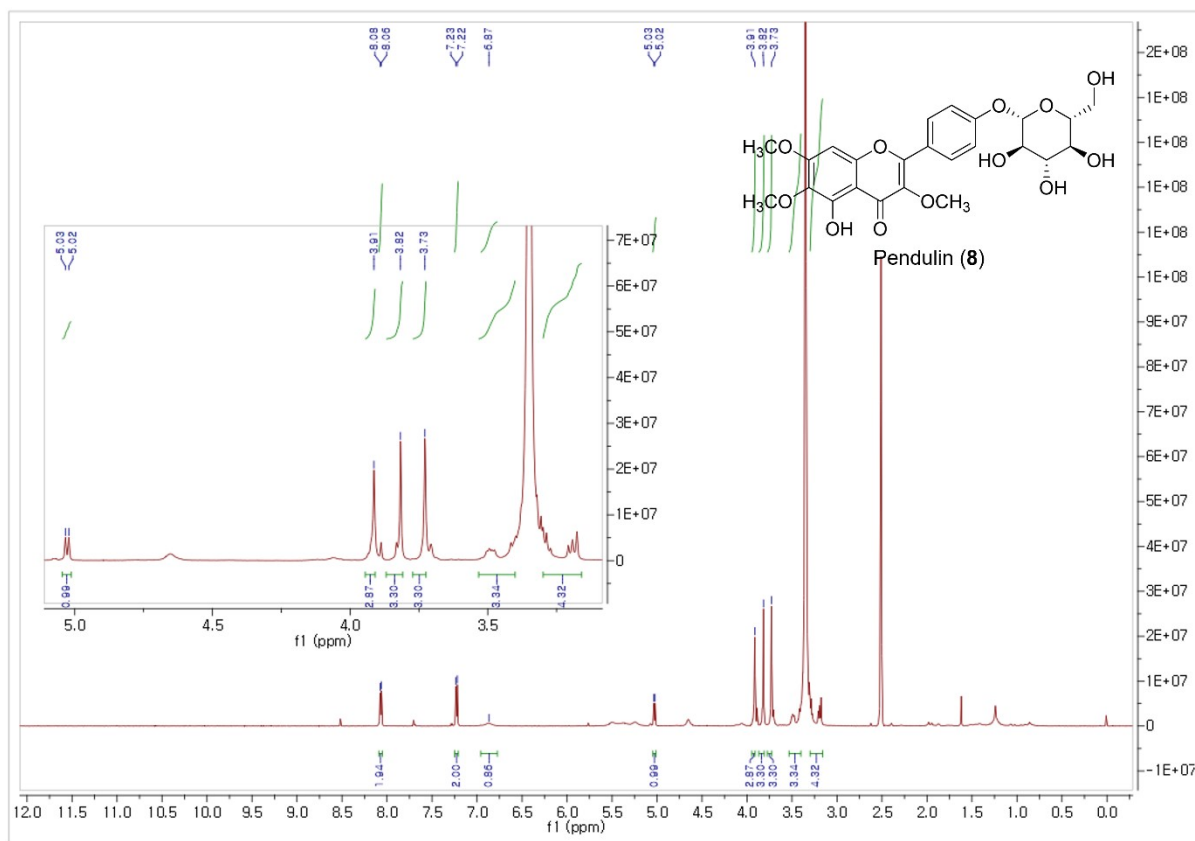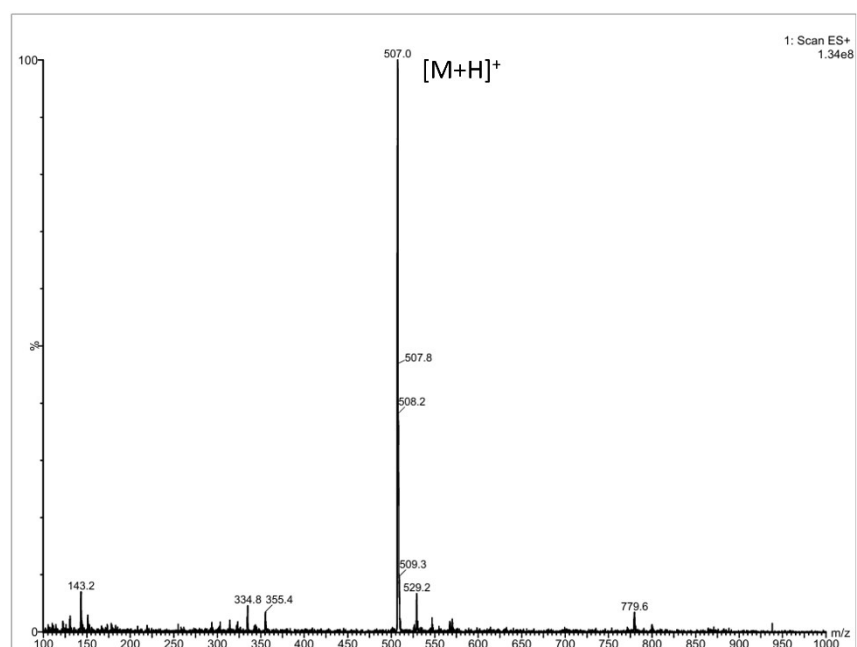

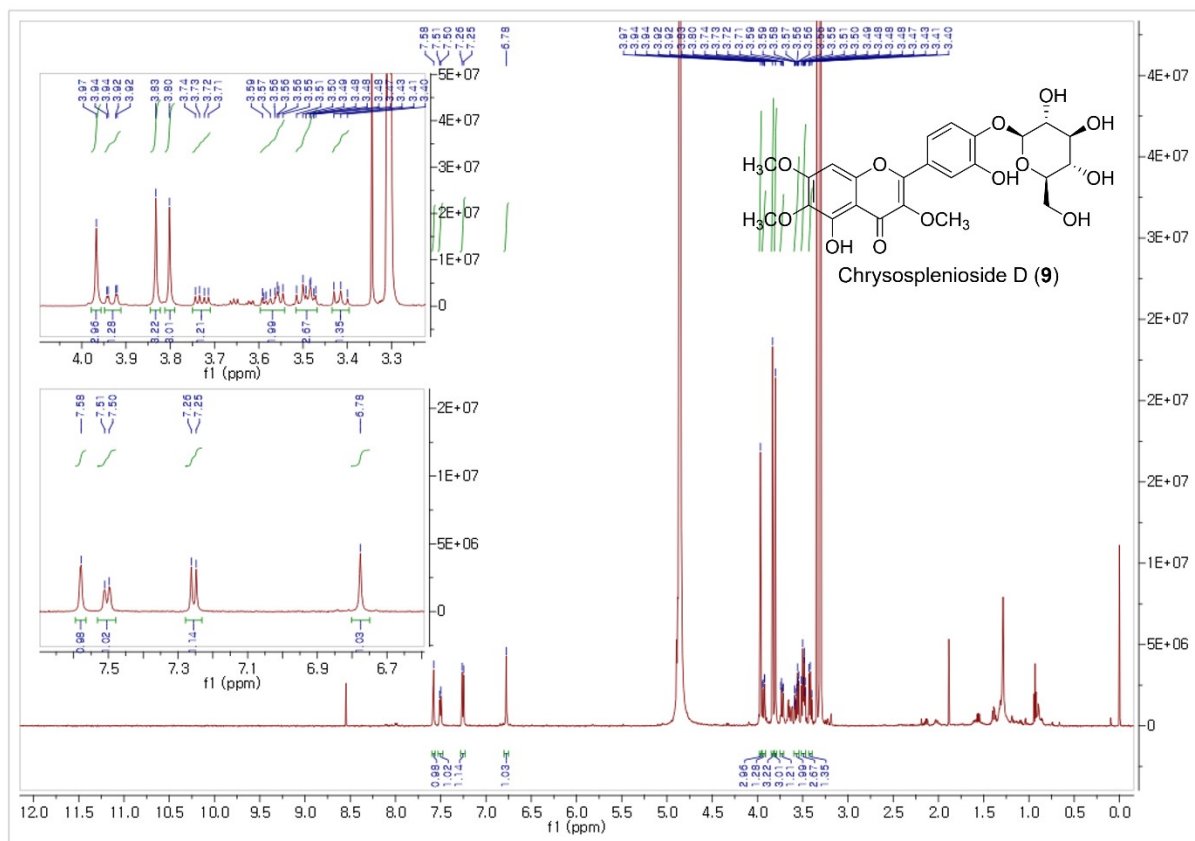

**Figure S23.**  $^1\text{H}$  NMR spectrum (600 MHz,  $\text{CD}_3\text{OD}$ ) of compound **9**

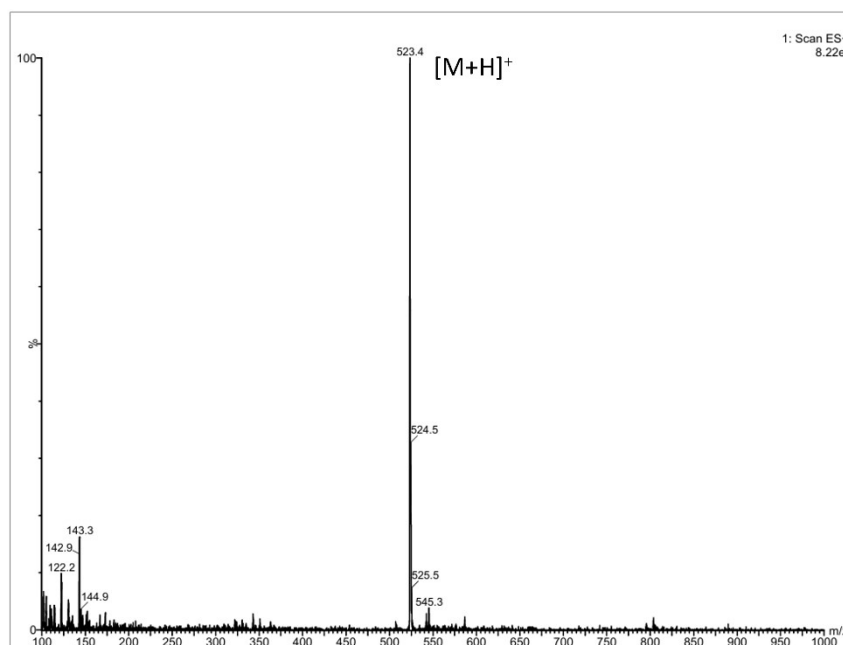

**Figure S24.** ESI-MS spectrum of compound **9**

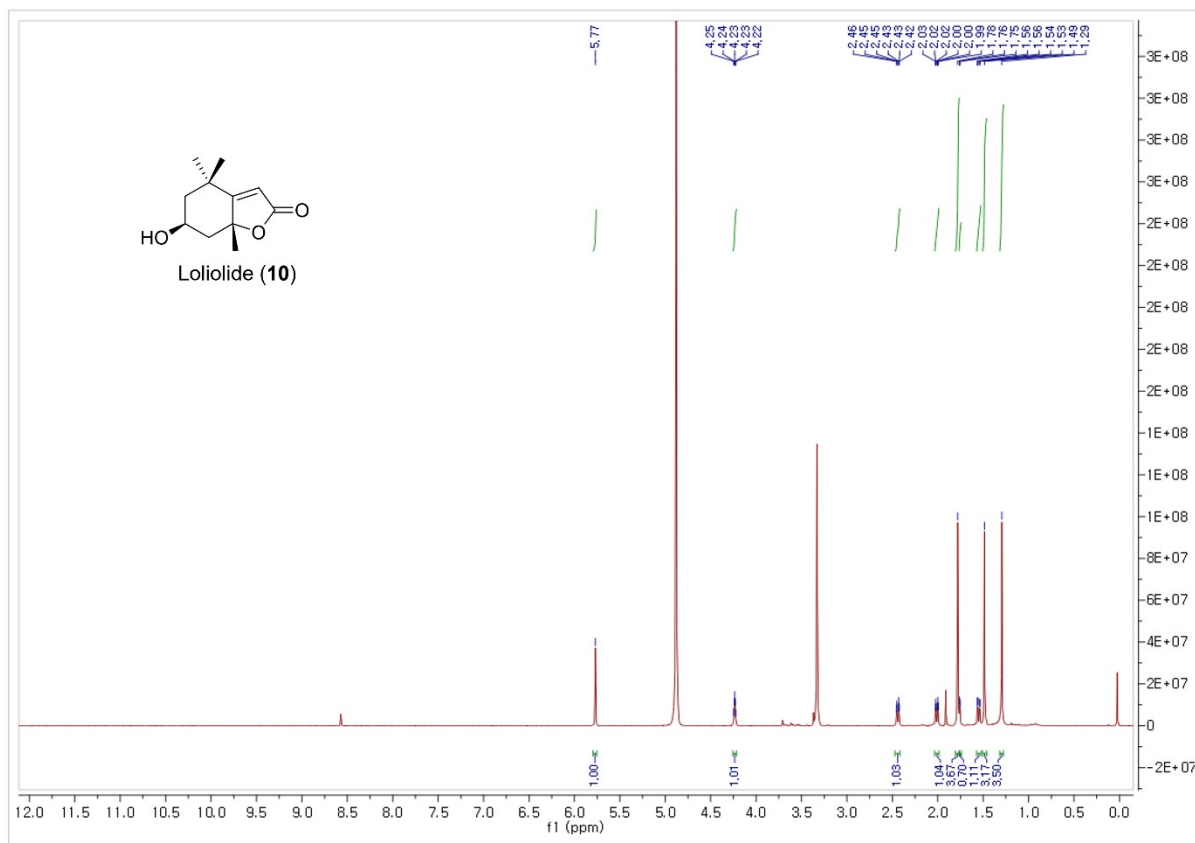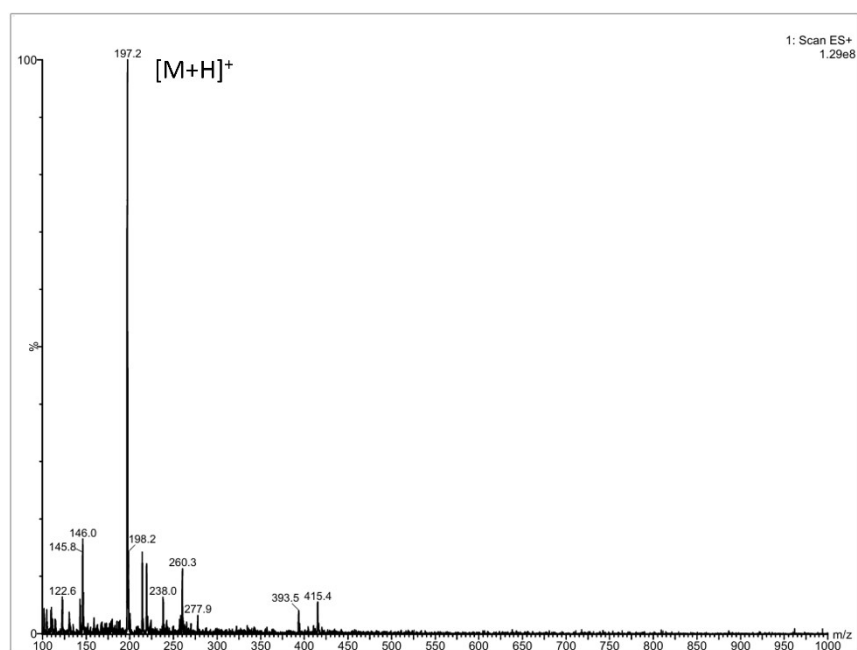

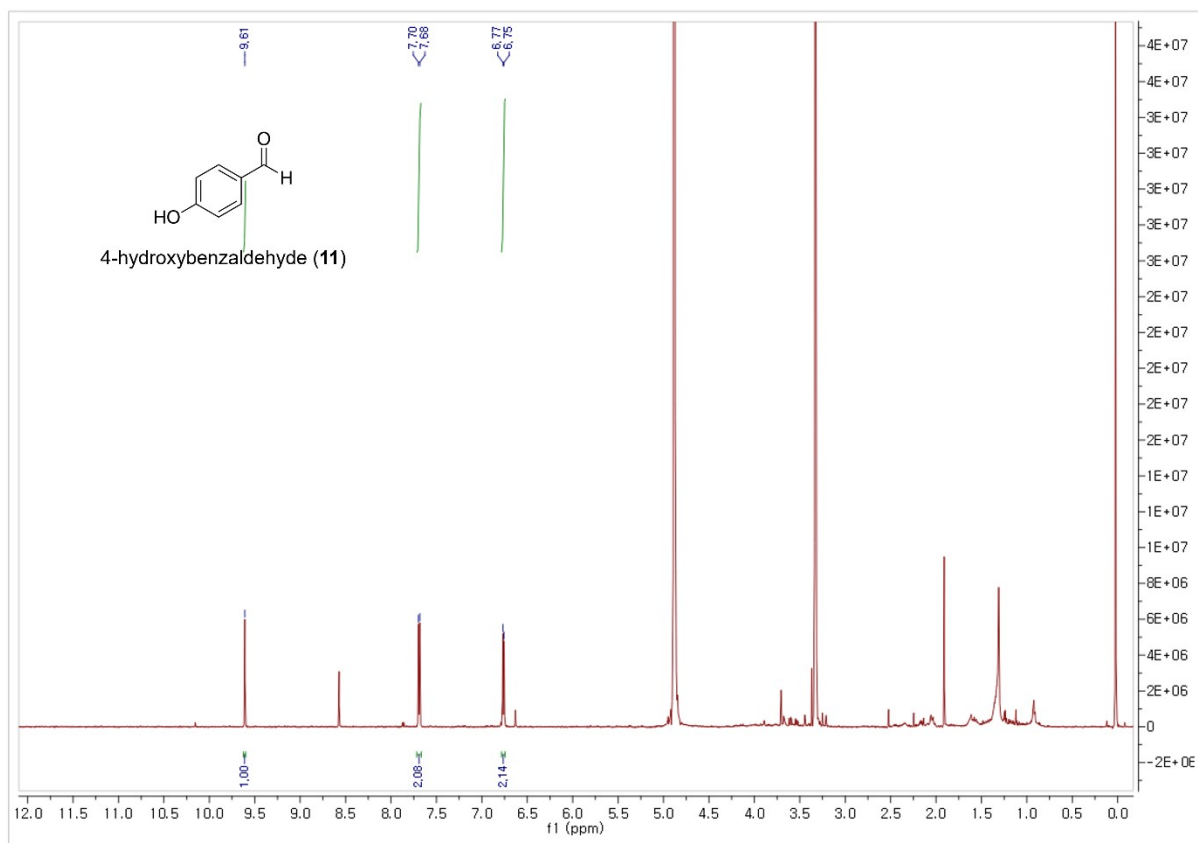

Figure S27.  $^1\text{H}$  NMR spectrum (600 MHz,  $\text{CD}_3\text{OD}$ ) of compound 11

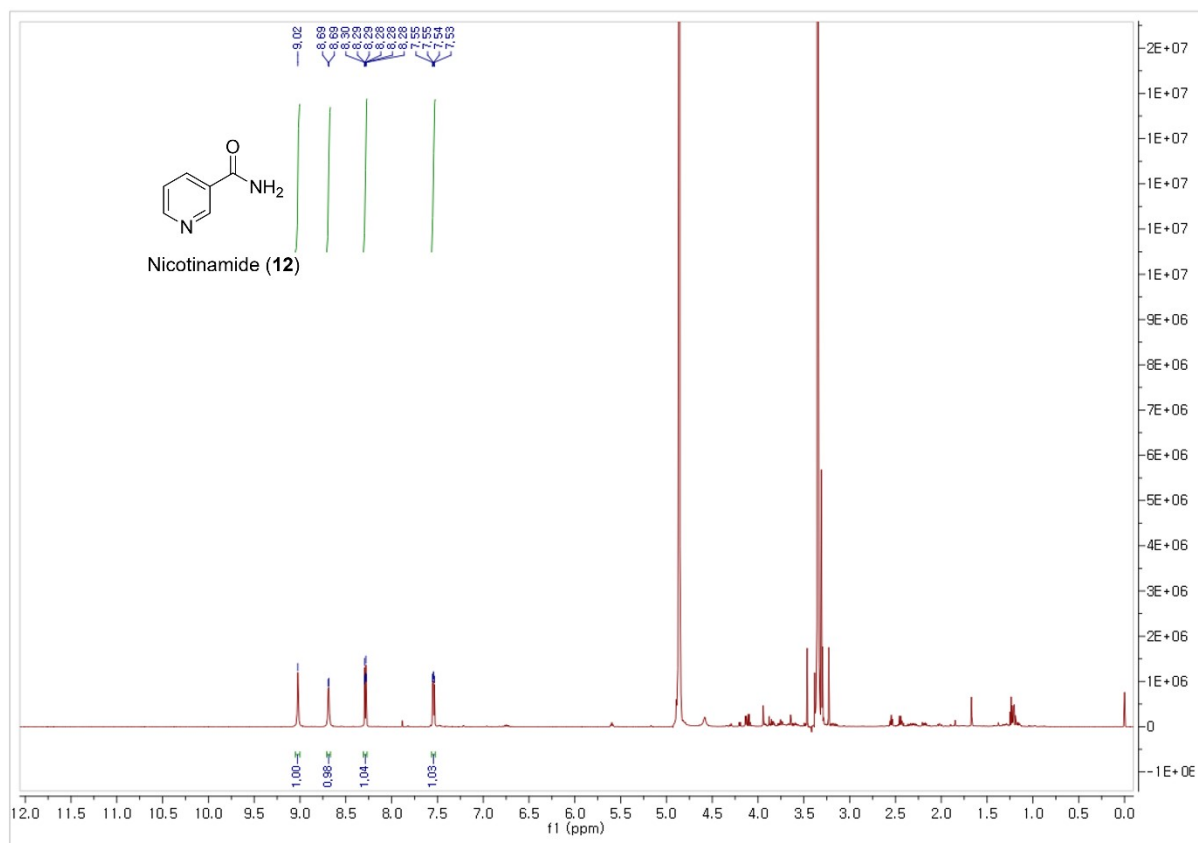

Figure S28.  $^1\text{H}$  NMR spectrum (600 MHz,  $\text{CD}_3\text{OD}$ ) of compound 12

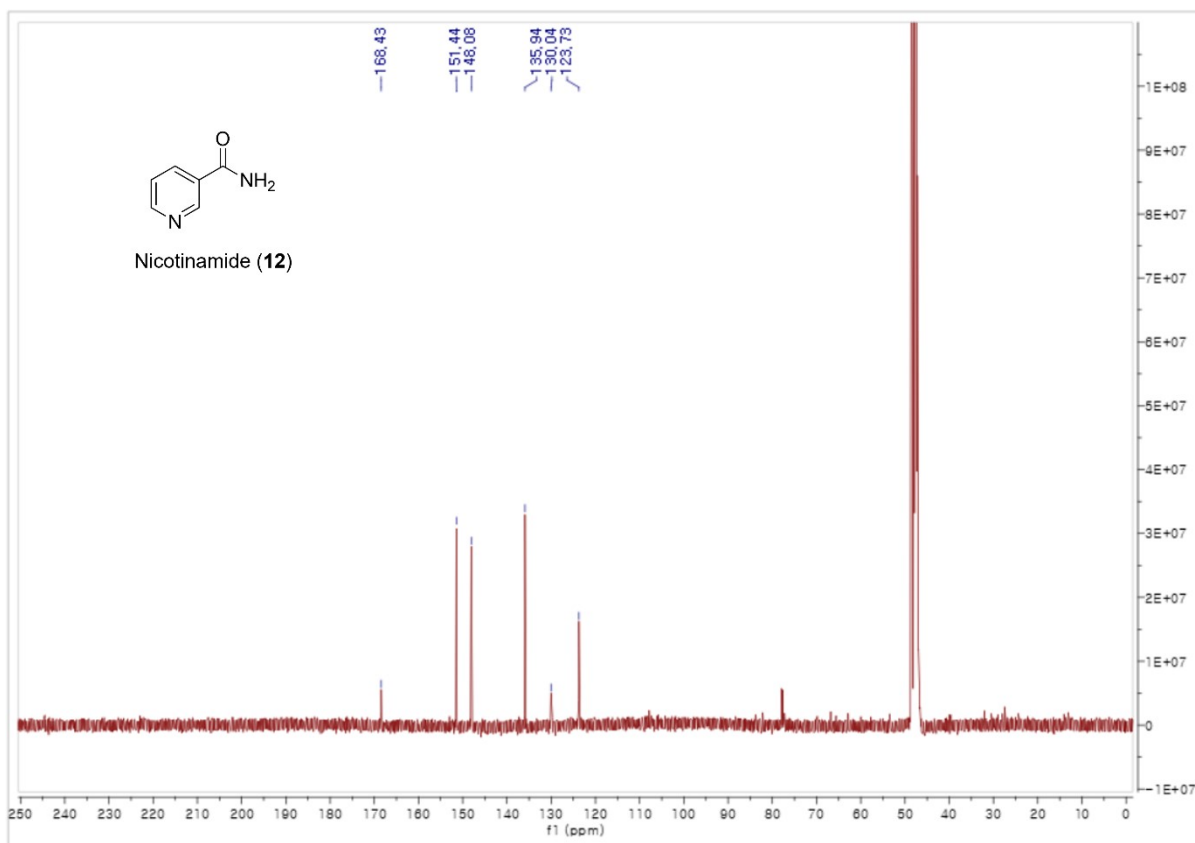

**Figure S29.** <sup>13</sup>C NMR spectrum (150 MHz, CD<sub>3</sub>OD) of compound **12**

| Functional |      | Solvent?     |            | Basis Set  |          | Type of Data    |          |
|------------|------|--------------|------------|------------|----------|-----------------|----------|
| B3LYP      |      | Gas Phase    |            | 6-31G(d,p) |          | Unscaled Shifts |          |
|            |      | DP4+         | 100.00%    | 0.00%      | -        | -               | -        |
| Nuclei     | sp2? | Experimental | Isomer 1   | Isomer 2   | Isomer 3 | Isomer 4        | Isomer 5 |
| c          |      | 28.43        | 30.6197668 | 30.6008977 |          |                 |          |
| c          |      | 67.86        | 67.1640533 | 67.5488146 |          |                 |          |
| c          |      | 78.59        | 78.2383026 | 77.4086168 |          |                 |          |
| c          |      | 41.35        | 44.0735367 | 43.9118747 |          |                 |          |
| c          | x    | 138.33       | 136.107348 | 136.763788 |          |                 |          |
| c          | x    | 119.8        | 118.986371 | 118.167982 |          |                 |          |
| c          |      | 23.47        | 25.8223151 | 25.9785042 |          |                 |          |
| c          |      | 43.19        | 44.961196  | 44.7197257 |          |                 |          |
| c          |      | 48.54        | 50.7628367 | 50.7807795 |          |                 |          |
| c          |      | 33.69        | 36.6442134 | 36.4571262 |          |                 |          |
| c          | x    | 215.53       | 205.420489 | 205.555929 |          |                 |          |
| c          |      | 48.58        | 48.1965455 | 48.1366351 |          |                 |          |
| c          |      | 50.66        | 53.8945971 | 53.698379  |          |                 |          |
| c          |      | 48.16        | 51.1422753 | 51.4904021 |          |                 |          |
| c          |      | 45.02        | 43.9365419 | 45.930173  |          |                 |          |
| c          |      | 71.82        | 72.7292462 | 73.0106112 |          |                 |          |
| c          |      | 58.38        | 59.2041176 | 61.9171225 |          |                 |          |
| c          |      | 19.06        | 20.3324992 | 19.3228447 |          |                 |          |
| c          |      | 18.92        | 21.9766358 | 21.7068668 |          |                 |          |
| c          |      | 74.11        | 72.8574196 | 76.2275976 |          |                 |          |
| c          |      | 26.03        | 28.2675799 | 24.2474902 |          |                 |          |
| c          |      | 48.58        | 54.5728147 | 44.8607557 |          |                 |          |
| c          |      | 70.11        | 69.6804376 | 78.6622465 |          |                 |          |
| c          | x    | 125.11       | 121.866605 | 121.997084 |          |                 |          |
| c          | x    | 135.9        | 134.14719  | 134.340696 |          |                 |          |
| c          |      | 24.48        | 24.9900651 | 24.9554584 |          |                 |          |
| c          |      | 17.04        | 17.1773917 | 16.9725495 |          |                 |          |
| c          |      | 26.18        | 25.0096351 | 25.0688808 |          |                 |          |
| c          |      | 24.75        | 25.9282277 | 26.1538998 |          |                 |          |
| c          |      | 18.31        | 17.5796474 | 17.0810736 |          |                 |          |
| c          |      | 98.86        | 98.7588772 | 106.356909 |          |                 |          |

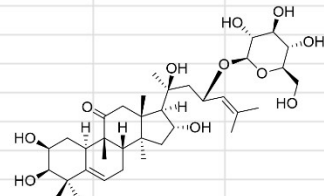

Isomer 1 (23S)  
DP4+: 100%

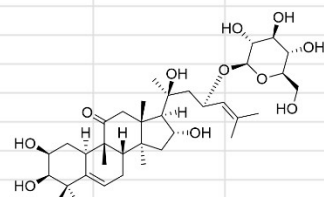

Isomer 1 (23R)  
DP4+: 0%

Figure S30. Results of DP4+ analysis of **1** (Isomer 1, 23S-1; Isomer 2, 23R-1)

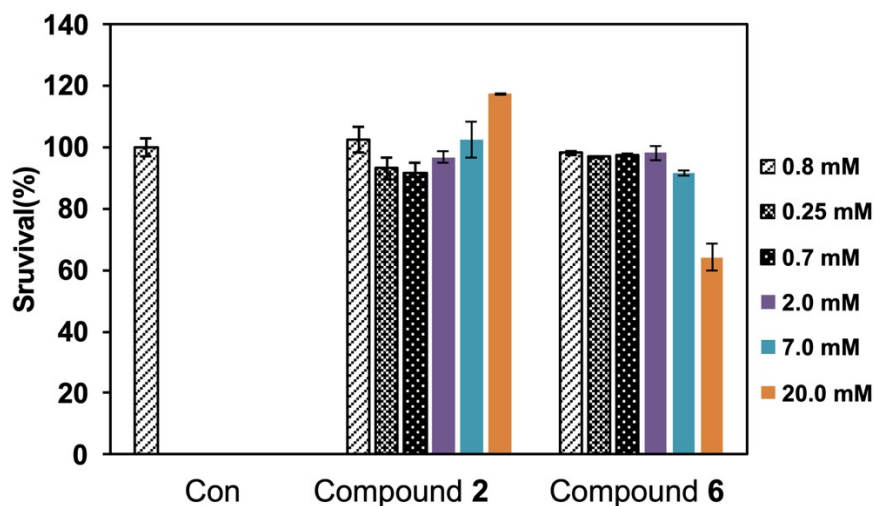

Figure S31. *In vitro* cell viability results of compounds **2** and **6**

**Table S1.** Gibbs free energies and Boltzmann distribution of conformers (23S-1)

| Conformers | B3LYP/6-31G(d,p) Gibbs free energy (298.15 K) |                       |                        |
|------------|-----------------------------------------------|-----------------------|------------------------|
|            | G (Hartree)                                   | $\Delta G$ (kcal/mol) | Boltzmann distribution |
| 23S-1_6    | -2232.838503                                  | 0.00                  | 21.79225%              |
| 23S-1_7    | -2232.838494                                  | 0.01                  | 21.57595%              |
| 23S-1_3    | -2232.838407                                  | 0.06                  | 19.67360%              |
| 23S-1_4    | -2232.838396                                  | 0.07                  | 19.46301%              |
| 23S-1_12   | -2232.836998                                  | 0.94                  | 4.42371%               |
| 23S-1_15   | -2232.836996                                  | 0.95                  | 4.41519%               |
| 23S-1_1    | -2232.836464                                  | 1.28                  | 2.51380%               |
| 23S-1_2    | -2232.836426                                  | 1.30                  | 2.41447%               |
| 23S-1_14   | -2232.83569                                   | 1.77                  | 1.10745%               |
| 23S-1_11   | -2232.835314                                  | 2.00                  | 0.74409%               |
| 23S-1_10   | -2232.834791                                  | 2.33                  | 0.42751%               |
| 23S-1_9    | -2232.834745                                  | 2.36                  | 0.40709%               |
| 23S-1_5    | -2232.834659                                  | 2.41                  | 0.37175%               |
| 23S-1_8    | -2232.834612                                  | 2.44                  | 0.35360%               |
| 23S-1_13   | -2232.834507                                  | 2.51                  | 0.31654%               |

**Table S2.** Gibbs free energies and Boltzmann distribution of conformers (23R-1)

| Conformers | B3LYP/6-31G(d,p) Gibbs free energy (298.15 K) |                       |                        |
|------------|-----------------------------------------------|-----------------------|------------------------|
|            | G (Hartree)                                   | $\Delta G$ (kcal/mol) | Boltzmann distribution |
| 23R-1_7    | -2232.840311                                  | 0.00                  | 57.01771%              |
| 23R-1_12   | -2232.839909                                  | 0.25                  | 37.24763%              |
| 23R-1_20   | -2232.838032                                  | 1.43                  | 5.10366%               |
| 23R-1_26   | -2232.835161                                  | 3.23                  | 0.24391%               |
| 23R-1_2    | -2232.834294                                  | 3.78                  | 0.09740%               |
| 23R-1_6    | -2232.833832                                  | 4.07                  | 0.05971%               |
| 23R-1_4    | -2232.833754                                  | 4.11                  | 0.05496%               |
| 23R-1_8    | -2232.833588                                  | 4.22                  | 0.04609%               |
| 23R-1_23   | -2232.833245                                  | 4.43                  | 0.03206%               |
| 23R-1_17   | -2232.832463                                  | 4.92                  | 0.01401%               |
| 23R-1_10   | -2232.832396                                  | 4.97                  | 0.01304%               |
| 23R-1_13   | -2232.832392                                  | 4.97                  | 0.01299%               |
| 23R-1_21   | -2232.832145                                  | 5.12                  | 0.01000%               |
| 23R-1_1    | -2232.832134                                  | 5.13                  | 0.00989%               |
| 23R-1_19   | -2232.832131                                  | 5.13                  | 0.00985%               |
| 23R-1_9    | -2232.831965                                  | 5.24                  | 0.00827%               |
| 23R-1_5    | -2232.831694                                  | 5.41                  | 0.00621%               |
| 23R-1_15   | -2232.831598                                  | 5.47                  | 0.00560%               |
| 23R-1_3    | -2232.831242                                  | 5.69                  | 0.00384%               |
| 23R-1_18   | -2232.83106                                   | 5.80                  | 0.00317%               |

**Table S3.** Experimental (Exp.) and calculated (Cal.) <sup>1</sup>H and <sup>13</sup>C chemical shift values and its

| Carbon | Exp.     | Cal.         |              | Proton      | Exp.     | Cal.         |              |
|--------|----------|--------------|--------------|-------------|----------|--------------|--------------|
|        | <b>1</b> | <b>23S-1</b> | <b>23R-1</b> |             | <b>1</b> | <b>23S-1</b> | <b>23R-1</b> |
| 1      | 28.43    | 30.61977     | 30.6009      | 1 $\alpha$  | 1.42     | 2.186212     | 2.127682     |
| 2      | 67.86    | 67.16405     | 67.54881     | 1 $\beta$   | 1.36     | 1.777567     | 1.824961     |
| 3      | 78.59    | 78.2383      | 77.40862     | 2           | 3.8      | 4.262658     | 4.320204     |
| 4      | 41.35    | 44.07354     | 43.91187     | 3           | 3.26     | 3.943628     | 3.978491     |
| 5      | 138.33   | 136.1073     | 136.7638     | 6           | 5.58     | 6.466632     | 6.383258     |
| 6      | 119.80   | 118.9864     | 118.168      | 7 $\alpha$  | 2.32     | 2.89248      | 2.875881     |
| 7      | 23.47    | 25.82232     | 25.9785      | 7 $\beta$   | 1.86     | 2.487997     | 2.357224     |
| 8      | 43.19    | 44.9612      | 44.71973     | 8           | 1.83     | 2.367222     | 2.303331     |
| 9      | 48.54    | 50.76284     | 50.78078     | 10          | 2.39     | 2.858824     | 2.897986     |
| 10     | 33.69    | 36.64421     | 36.45713     | 12 $\alpha$ | 2.37     | 2.864625     | 3.068867     |
| 11     | 215.53   | 205.4205     | 205.5559     | 12 $\beta$  | 3.18     | 3.480716     | 3.568654     |
| 12     | 48.58    | 48.19655     | 48.13664     | 15 $\alpha$ | 1.76     | 2.463545     | 2.333477     |
| 13     | 50.66    | 53.8946      | 53.69838     | 15 $\beta$  | 1.38     | 2.140099     | 1.63664      |
| 14     | 48.16    | 51.14228     | 51.4904      | 16          | 4.48     | 5.4367       | 5.438833     |
| 15     | 45.02    | 43.93654     | 45.93017     | 17          | 2.48     | 2.779306     | 2.494401     |
| 16     | 71.82    | 72.72925     | 73.01061     | 18          | 0.77     | 1.509612     | 1.47902      |
| 17     | 58.38    | 59.20412     | 61.91712     | 19          | 1.01     | 1.61881      | 1.597004     |
| 18     | 19.06    | 20.3325      | 19.32284     | 21          | 1.33     | 1.61725      | 1.962712     |
| 19     | 18.92    | 21.97664     | 21.70687     | 22          | 1.5      | 1.72308      | 3.116236     |
| 20     | 74.11    | 72.85742     | 76.2276      | 22          | 2.07     | 2.672233     | 1.776684     |
| 21     | 26.03    | 28.26758     | 24.24749     | 23          | 4.84     | 5.537793     | 5.278745     |
| 22     | 48.58    | 54.57281     | 44.86076     | 24          | 5.04     | 5.689804     | 5.961264     |
| 23     | 70.11    | 69.68044     | 78.66225     | 26          | 1.65     | 2.201564     | 2.201564     |
| 24     | 125.11   | 121.8666     | 121.9971     | 27          | 1.63     | 2.264308     | 2.283987     |
| 25     | 135.90   | 134.1472     | 134.3407     | 28          | 0.95     | 1.704363     | 1.704363     |
| 26     | 24.48    | 24.99007     | 24.95546     | 29          | 1.09     | 1.521751     | 1.518481     |
| 27     | 17.04    | 17.17739     | 16.97255     | 30          | 1.22     | 1.890803     | 1.882292     |
| 28     | 26.18    | 25.00964     | 25.06888     | 1'          | 4.09     | 4.669886     | 4.851644     |
| 29     | 24.75    | 25.92823     | 26.1539      | 2'          | 3.08     | 3.559356     | 3.488059     |
| 30     | 18.31    | 17.57965     | 17.08107     | 3'          | 3.19     | 3.854897     | 3.910852     |
| 1'     | 98.86    | 98.75888     | 106.3569     | 4'          | 3.1      | 3.709907     | 3.756824     |
| 2'     | 73.56    | 73.15186     | 72.96672     | 5'          | 3.07     | 3.844415     | 3.83384      |
| 3'     | 76.78    | 76.0103      | 76.40899     | 6'          | 3.78     | 4.458449     | 4.398545     |
| 4'     | 70.62    | 69.94536     | 70.367       | 6'          | 3.53     | 3.997411     | 4.059218     |
| 5'     | 76.86    | 79.43351     | 76.9393      |             |          |              |              |
| 6'     | 61.66    | 60.95559     | 61.83522     |             |          |              |              |

possible isomer **23S-1** and **23R-1** used for DP4+ analysis

**Table S4.** Linear regression data for the quantitation analysis of compound 6

| <b>Parameter</b>                  | <b>Compound 6 (Cirsimaritin)</b> |
|-----------------------------------|----------------------------------|
| Concentration Range (mg/mL)       | 0.5—0.015625                     |
| Regression equation               | $y = 6788x + 21,664$             |
| Correlation coefficient ( $R^2$ ) | 0.9992                           |
| Slope                             | 6788                             |
| Average content (mg/g)            | 17.37                            |
